# Supplementary material
Source: Springer Nature journal article supplement (https://www.springermedizin.de/resource/supplementary/12879_2011_1681_MOESM6_ESM.pdf/9443098)

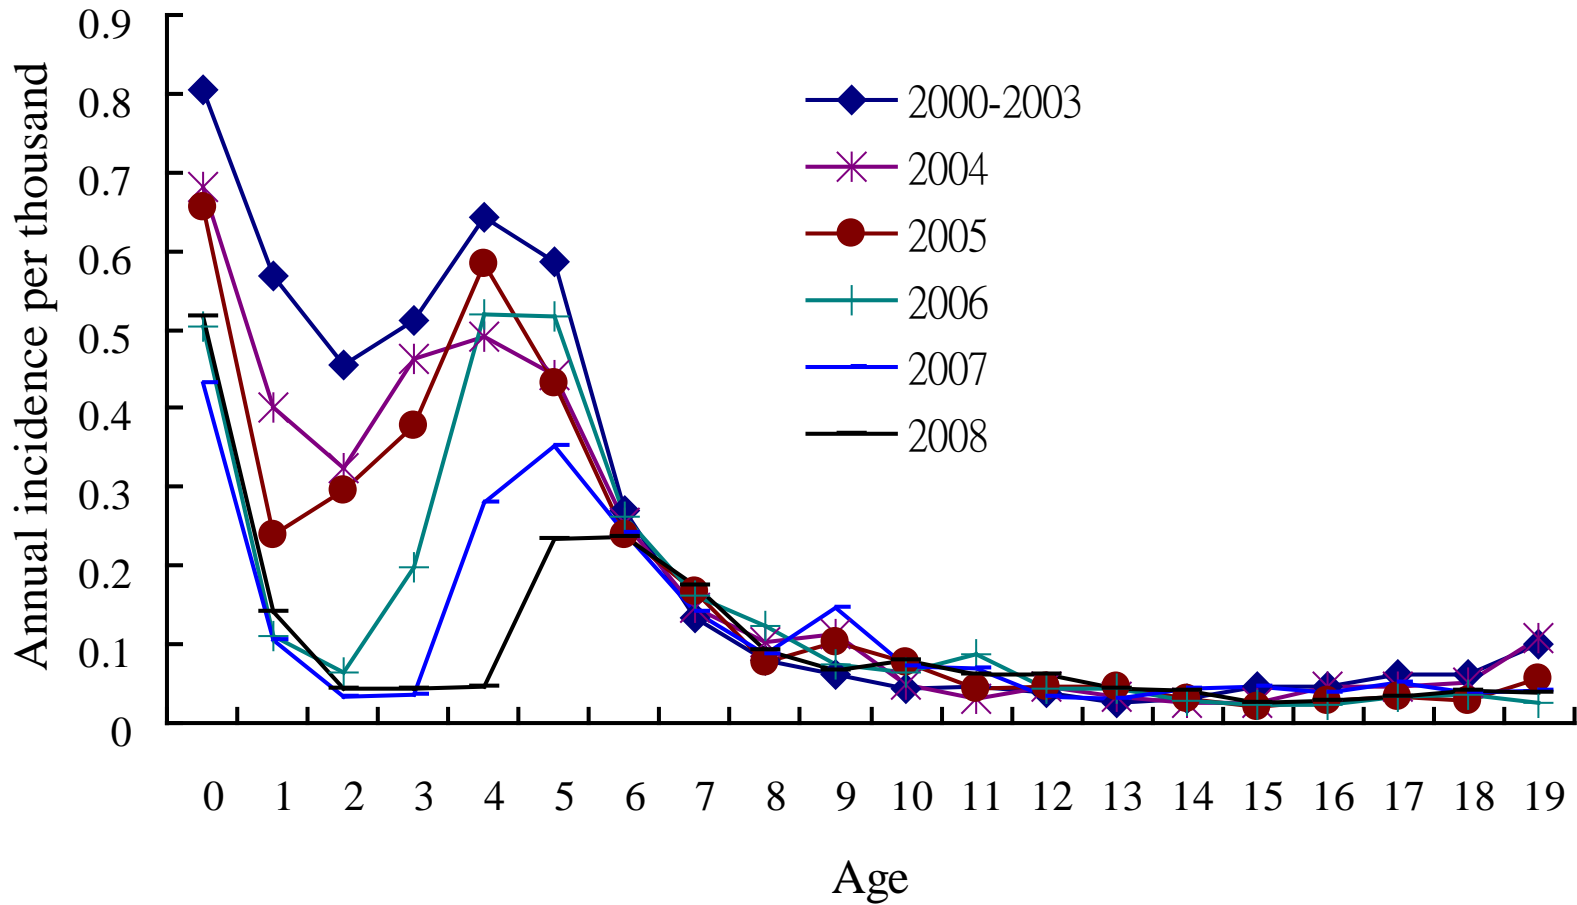

Supplement: MOESM6 [file 9443098]
